# Supplementary material
Source: PubMed Central journal article supplement (PMC3398484)

**a**

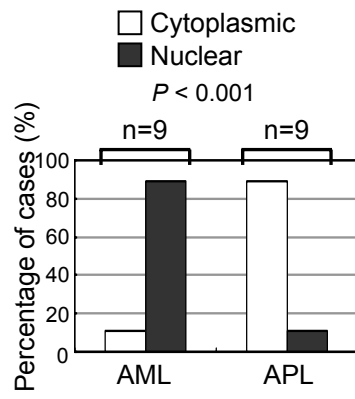

**b**

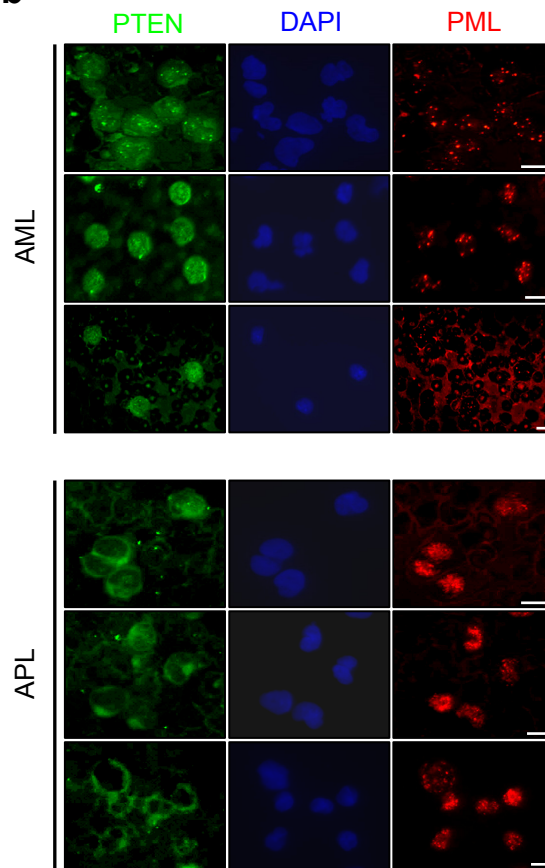

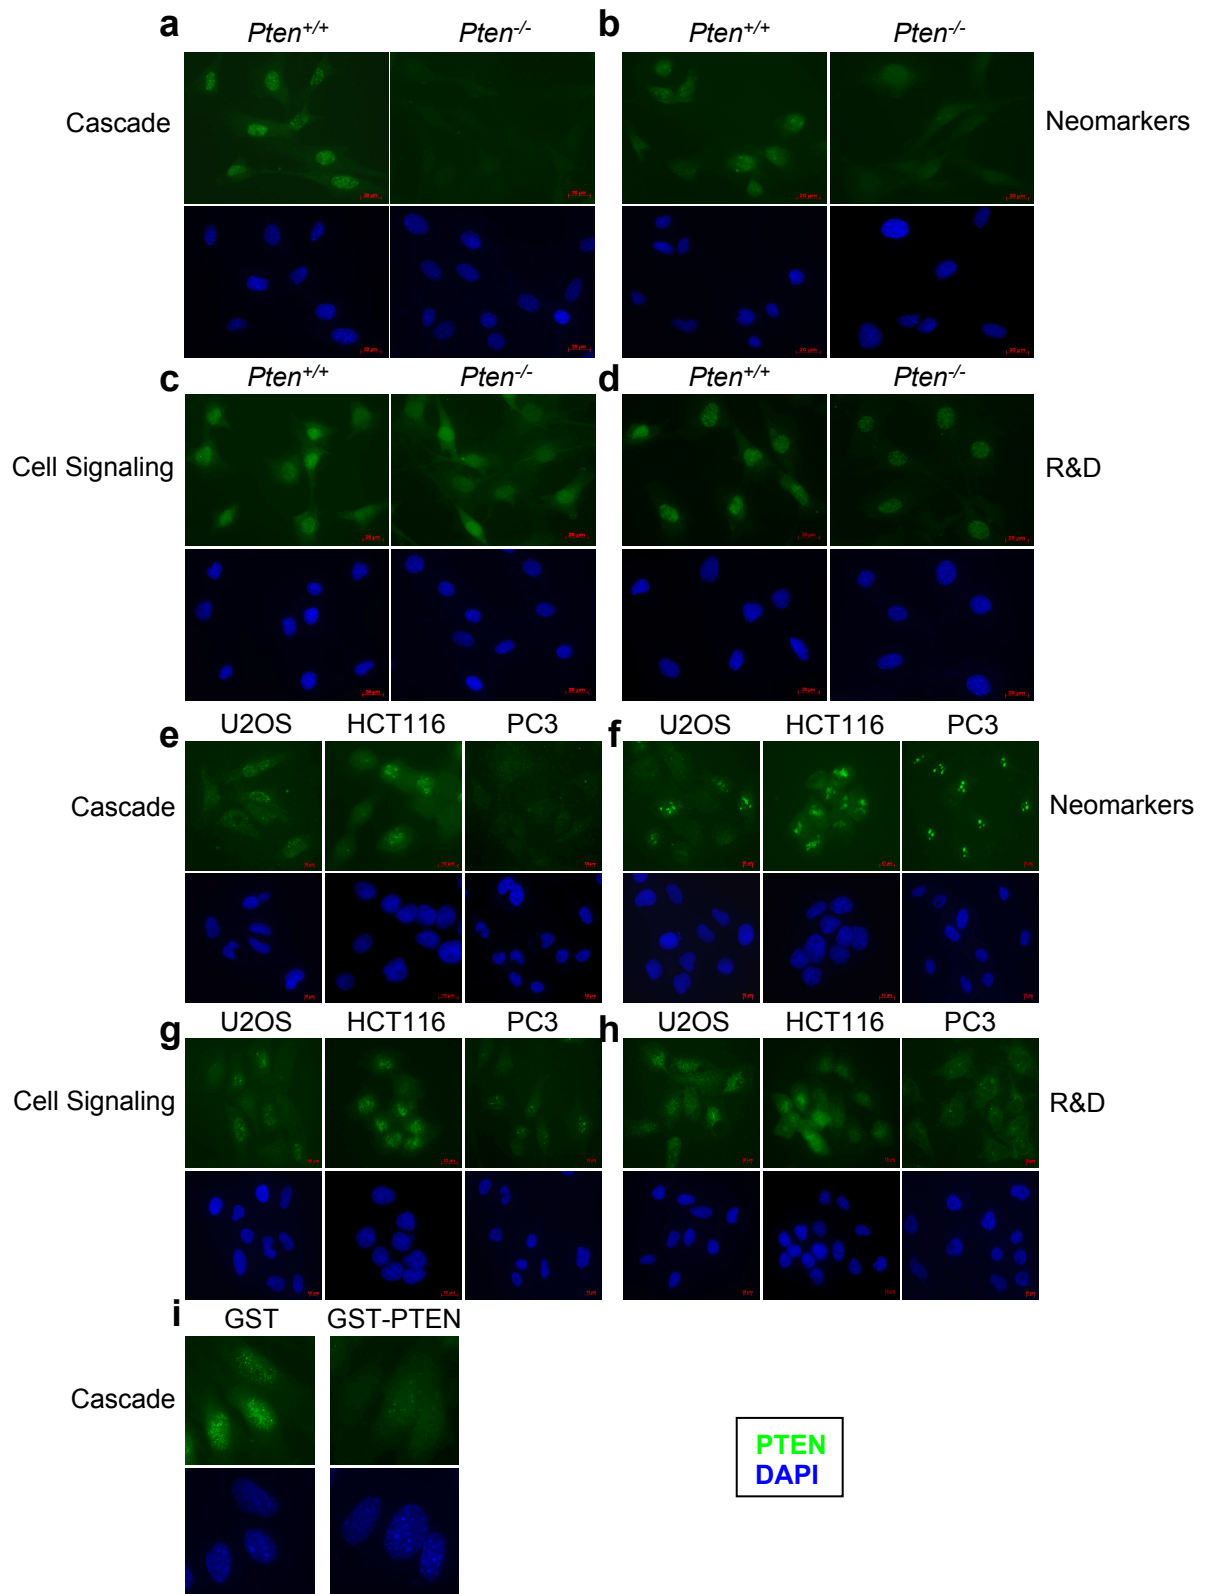

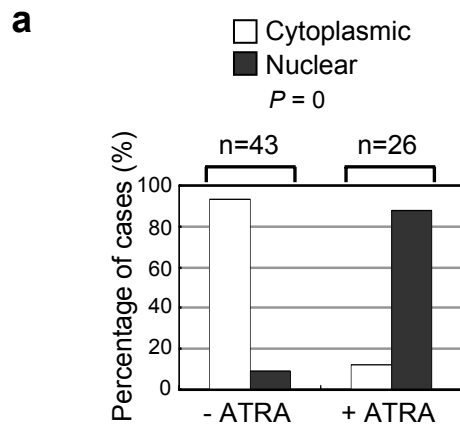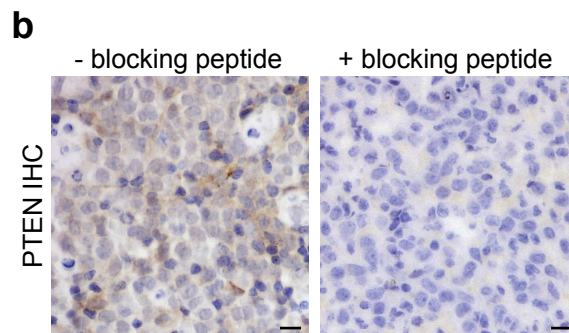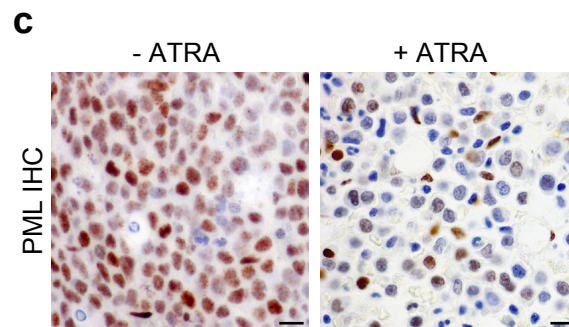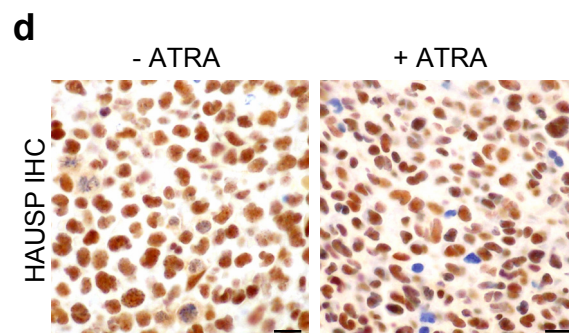

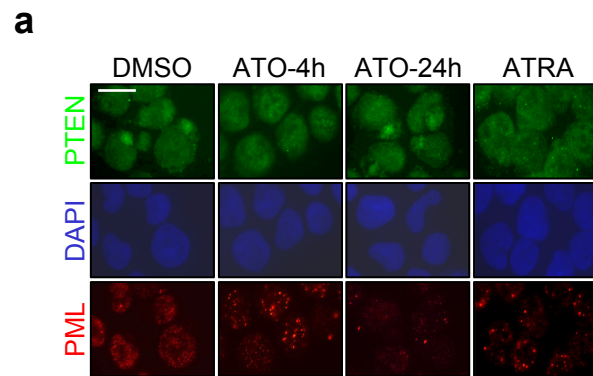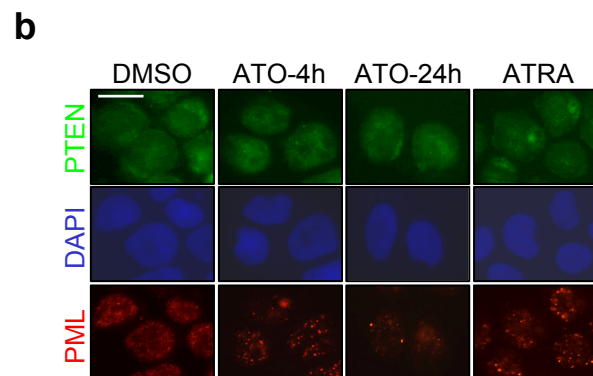

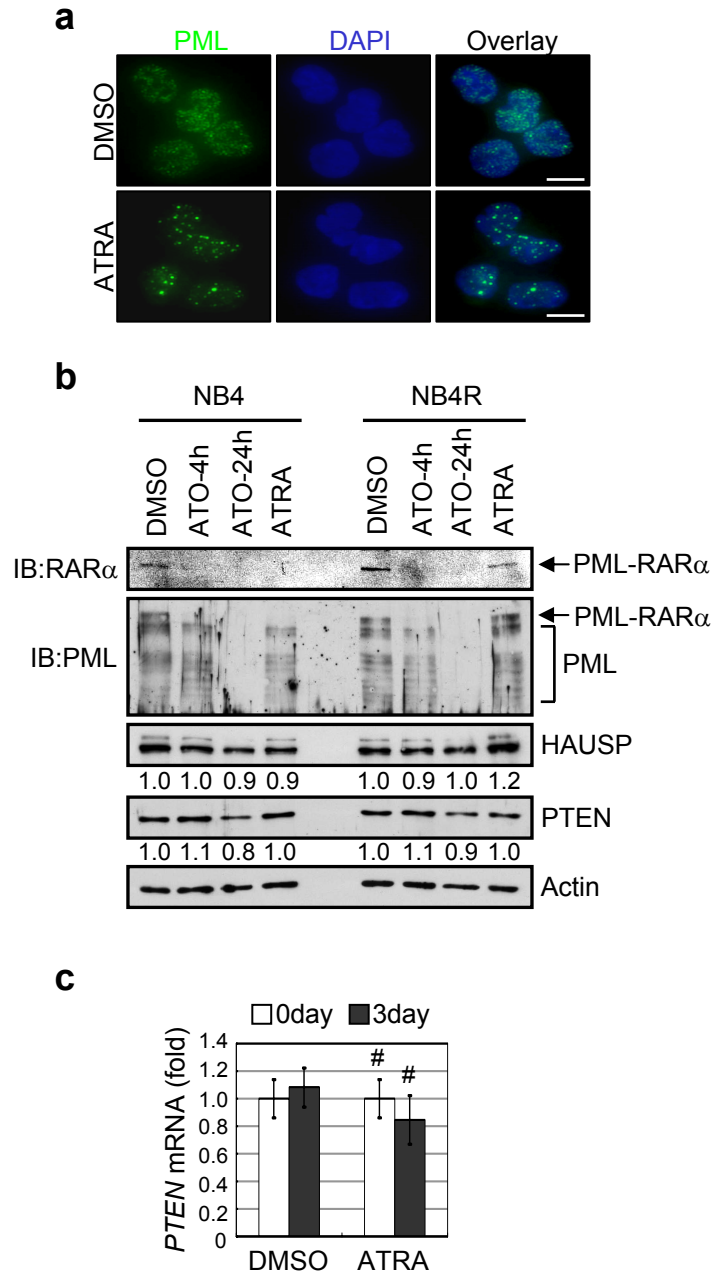

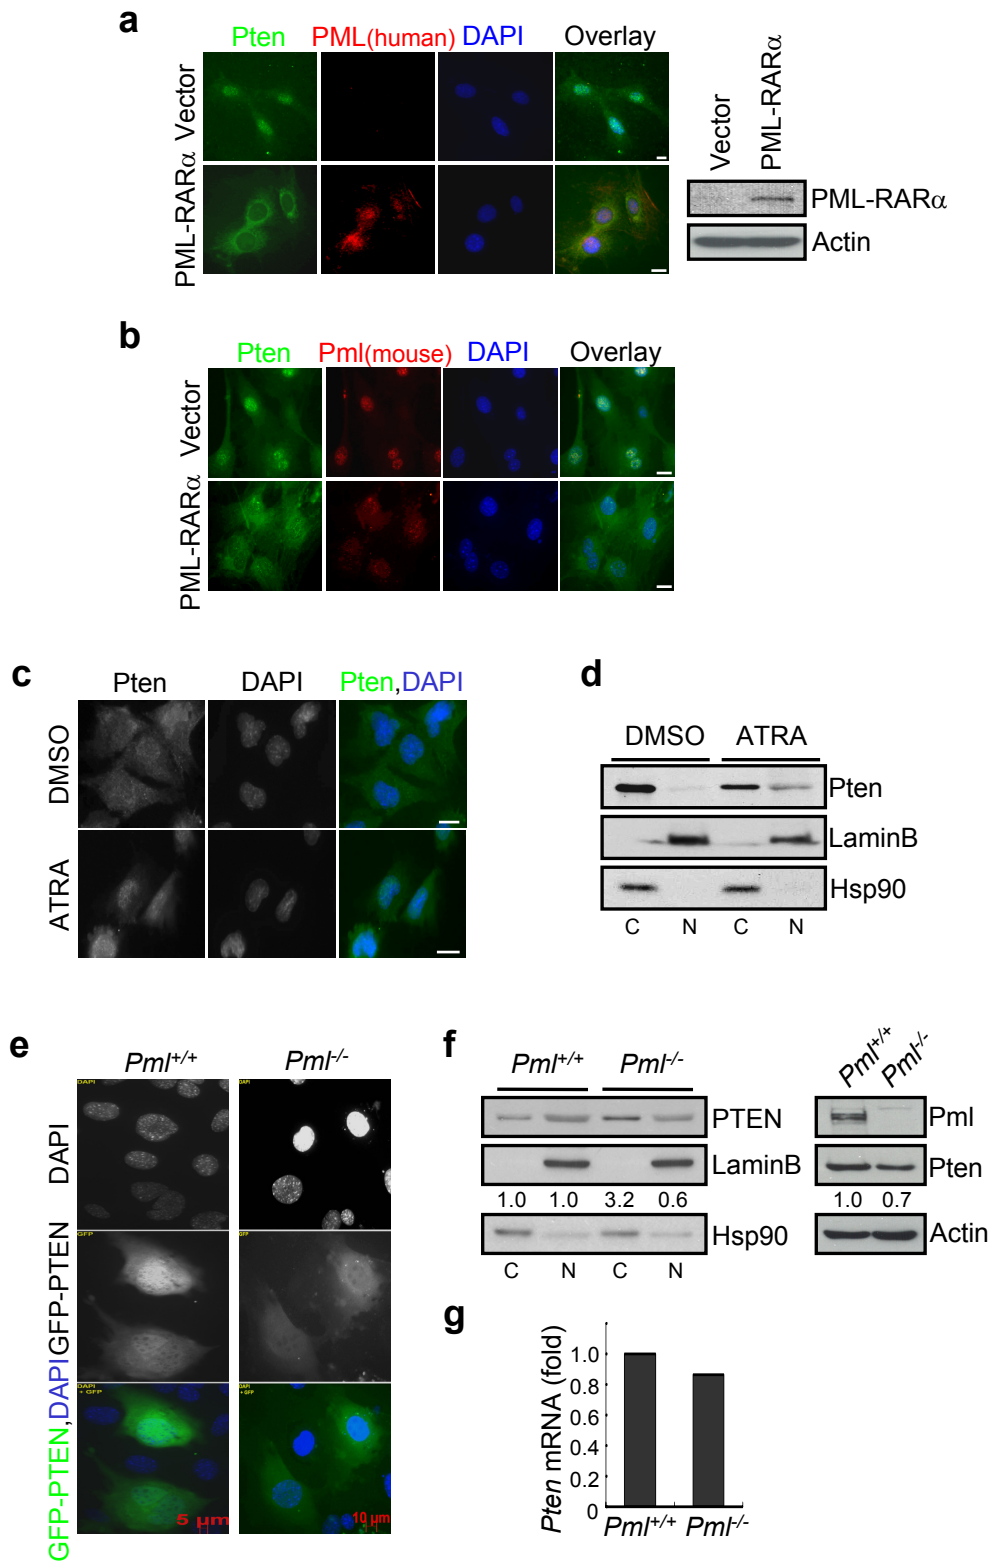

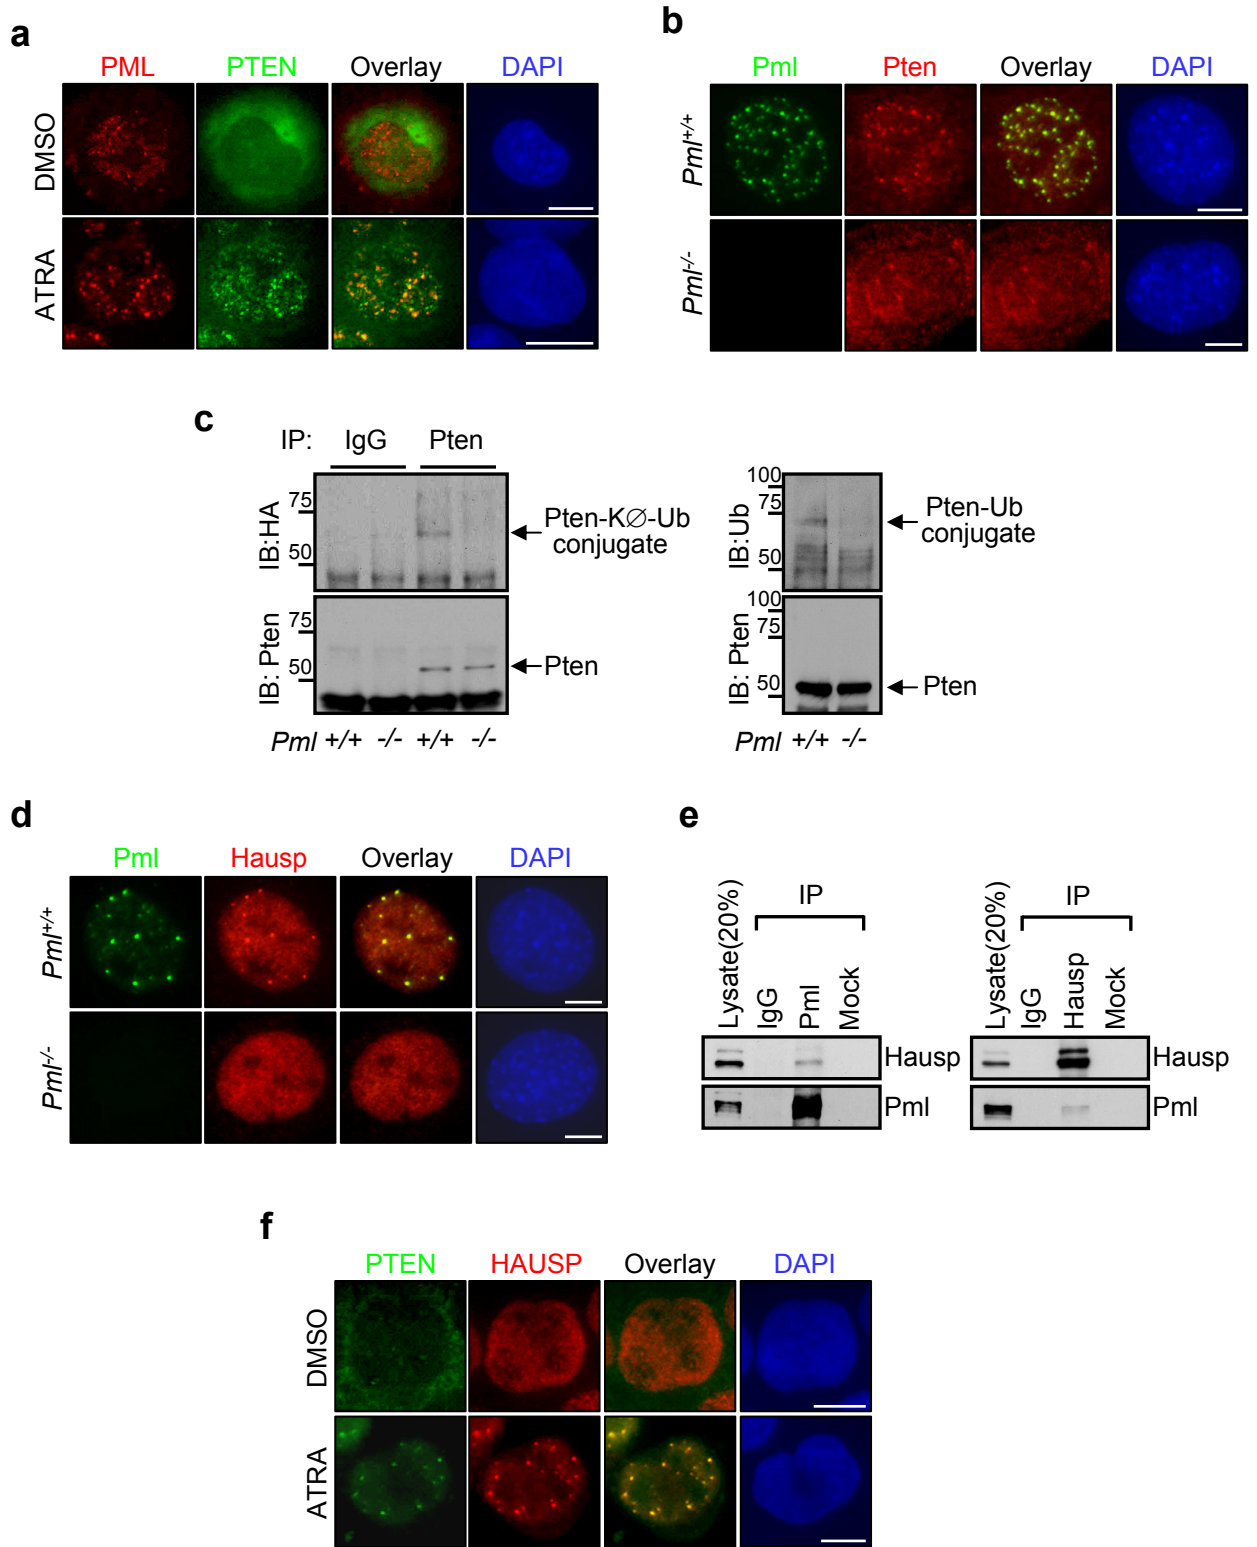

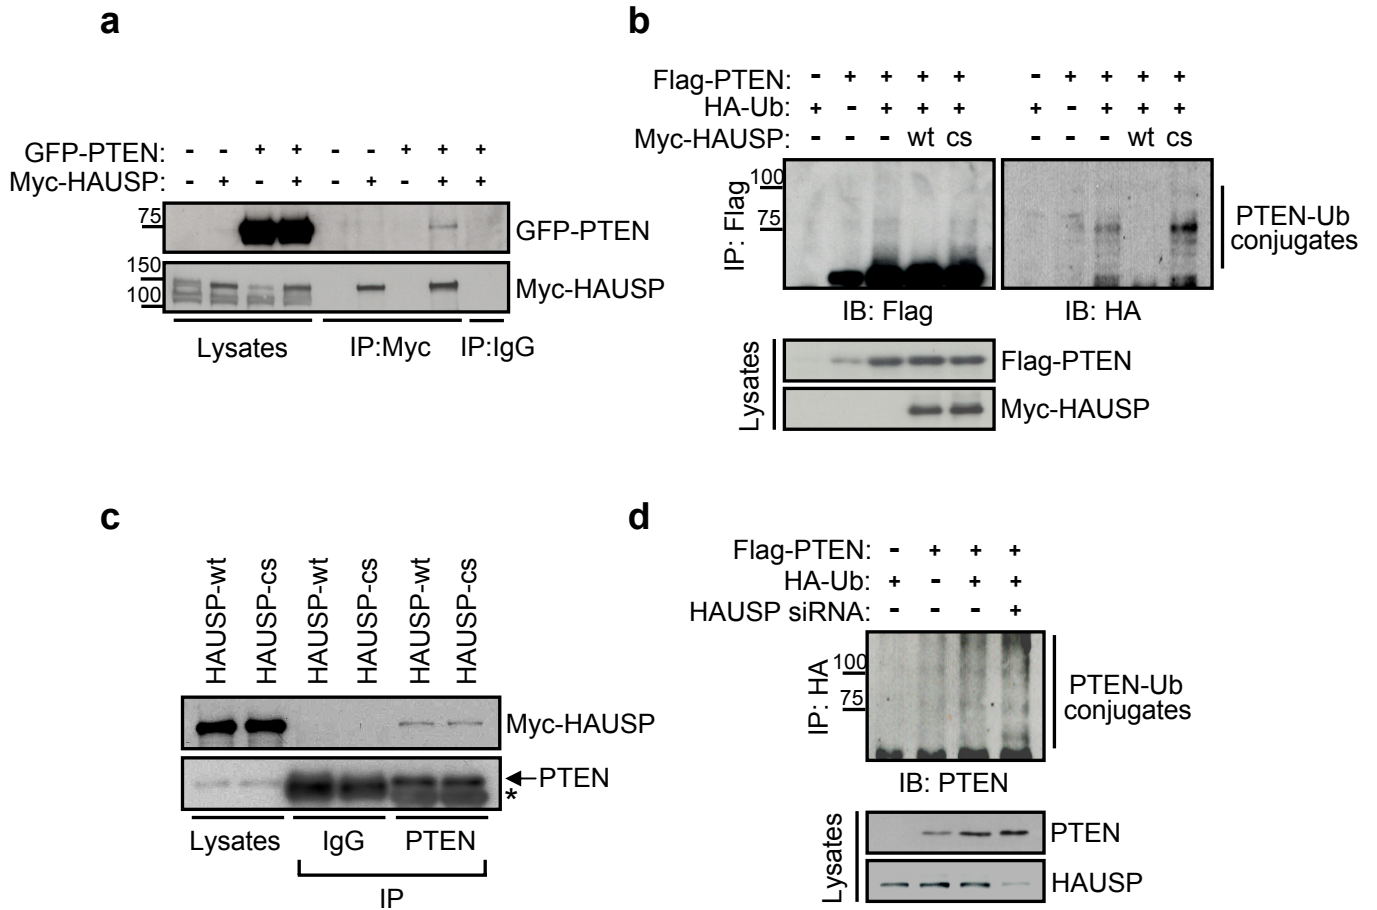



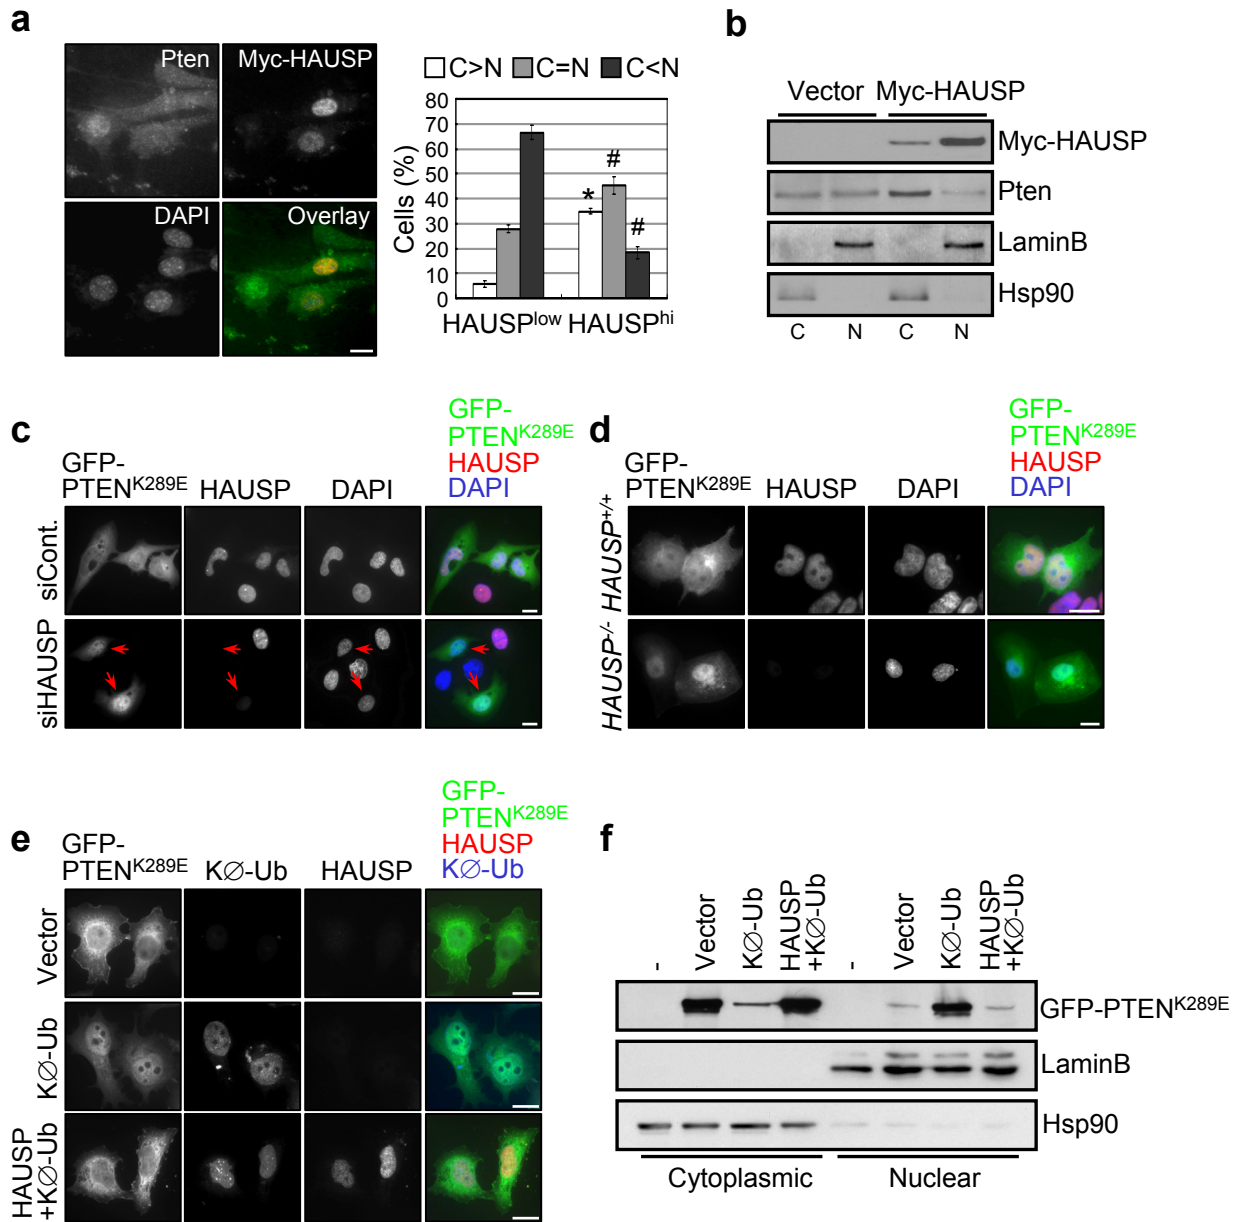

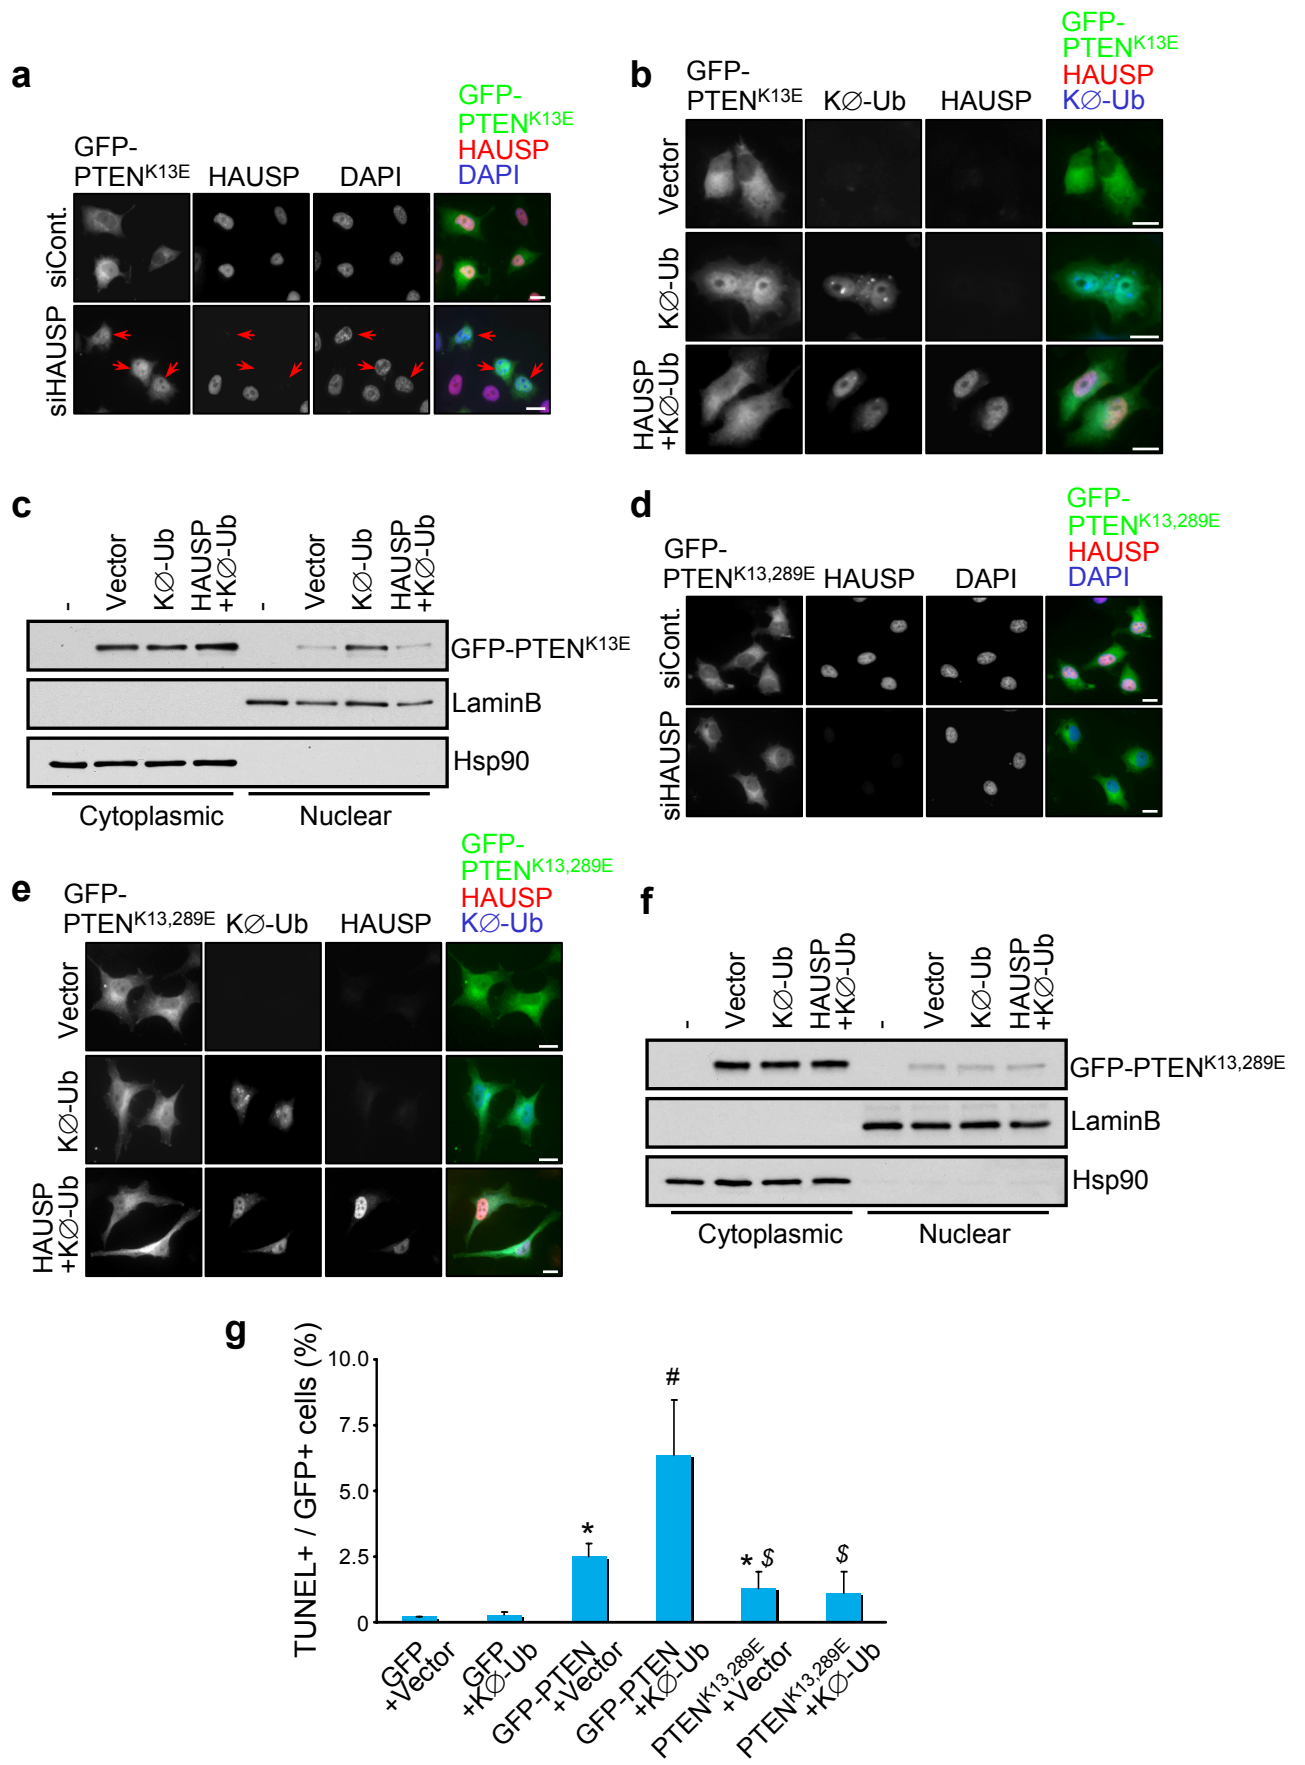

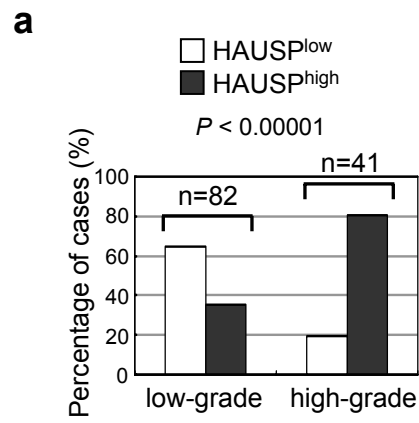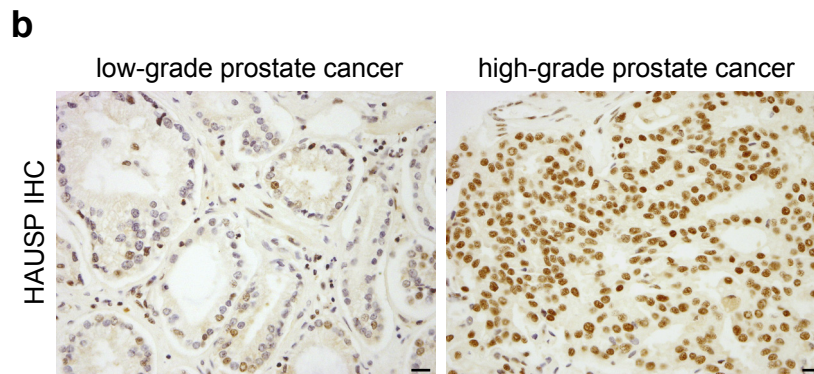

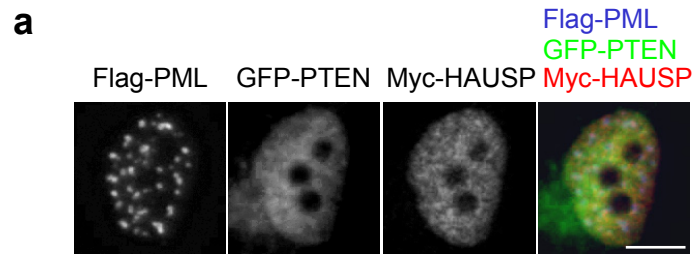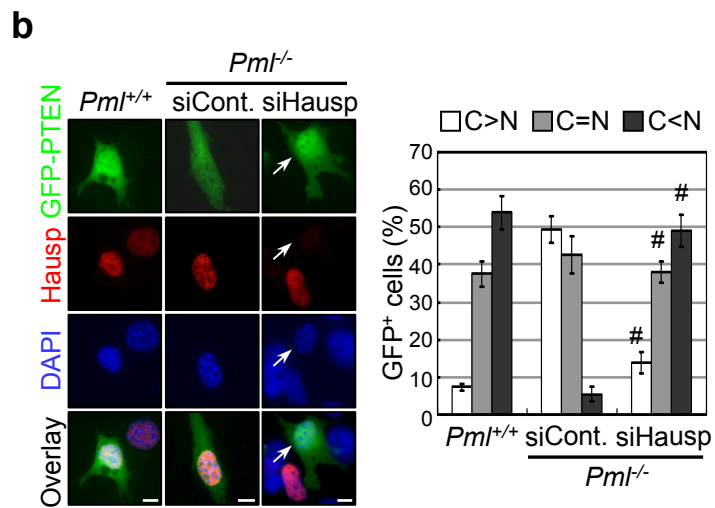

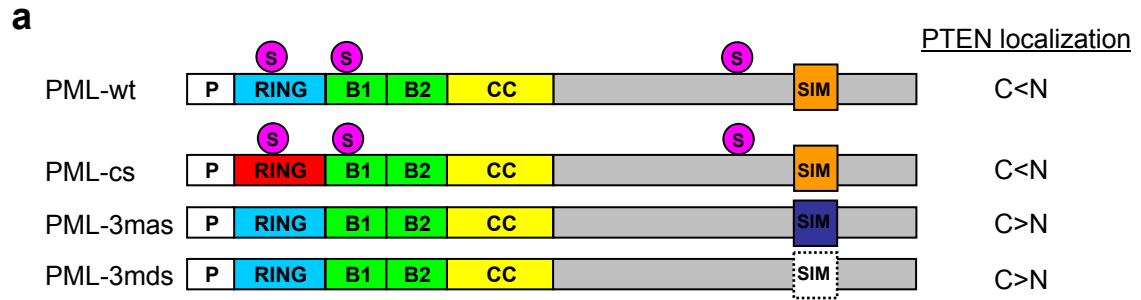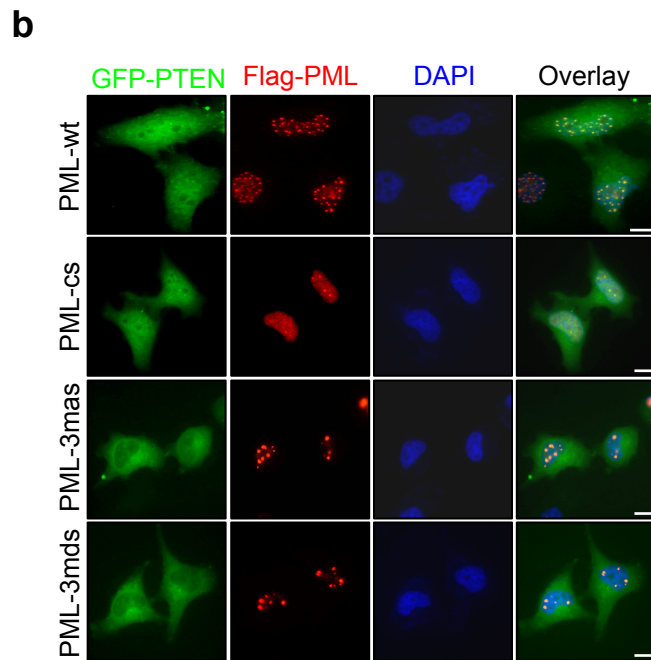

Supplement: NIHMS276220-supplement-supp_files.pdf [file NIHMS276220-supplement-supp_files.pdf]
